# Preface

---

---

Single best answer style questions are the most popular means of written assessment in both undergraduate and postgraduate medical examinations. Each clinical vignette is followed by a list of five possible answers, of which there is one that is the most clinically appropriate. The questions are designed to test the candidates' medical knowledge and their ability to apply this to clinical scenarios, rather than just their capability to recall facts.

The 320 questions are divided into 11 commonly tested areas of medicine, surgery and sub-specialities. The questions are written in the same format as those in medical school exams and are designed to provide a comprehensive coverage of the medical school curriculum.

This improved edition contains updated and new questions that are in line with the most recent developments in clinical guidelines as well as being written in accordance with the recent changes to medical school examinations. It also contains a proportion of harder stems that are designed to challenge the reader and help the student reach their maximum potential. The more challenging questions push the reader to think through various aspects of the topic being tested; requiring a multi-step thought process to reach the correct answer. This type of questioning is becoming increasingly popular in medical school examinations.

The answers provide detailed explanations as to how the correct answer is reached, followed by a clear discussion of how the incorrect answers are ruled out and supplementary information about other important aspects of each question.

Progression through each section will allow the reader to grow and develop their single best answer technique, as well as acquire useful knowledge and understanding that is needed during clinical practice; a combination of which will leave the reader well prepared for medical exams.

Good luck with your examination preparation.
